# Supplementary material
Source: publisher site journal article supplement (https://www.spandidos-publications.com/7747/downloadSupplementary)
Supplement: Supplementary file 1 [file downloadSupplementary]

## Sheet: Sheet1
Table SI. 731 immune cell types.
Trait type	Panel	Statistical trait name	Trait	GWAS Catalog Accession Number	id
Relative count	B cell	BC_Trait1	IgD+ %B cell	GCST90001391	ebi-a-GCST90001391
Absolute count	B cell	BC_Trait10	IgD+ CD38br AC	GCST90001392	ebi-a-GCST90001392
Relative count	B cell	BC_Trait11	IgD+ CD38dim %B cell	GCST90001393	ebi-a-GCST90001393
Absolute count	B cell	BC_Trait12	IgD+ CD38dim AC	GCST90001394	ebi-a-GCST90001394
Relative count	B cell	BC_Trait13	IgD+ CD38- %B cell	GCST90001395	ebi-a-GCST90001395
Absolute count	B cell	BC_Trait14	IgD+ CD38- AC	GCST90001396	ebi-a-GCST90001396
Relative count	B cell	BC_Trait17	Unsw mem %B cell	GCST90001397	ebi-a-GCST90001397
Absolute count	B cell	BC_Trait18	Unsw mem AC	GCST90001398	ebi-a-GCST90001398
Relative count	B cell	BC_Trait19	IgD- CD27- %B cell	GCST90001399	ebi-a-GCST90001399
Absolute count	B cell	BC_Trait2	IgD+ AC	GCST90001400	ebi-a-GCST90001400
Absolute count	B cell	BC_Trait20	IgD- CD27- AC	GCST90001401	ebi-a-GCST90001401
Relative count	B cell	BC_Trait21	Sw mem %B cell	GCST90001402	ebi-a-GCST90001402
Absolute count	B cell	BC_Trait22	Sw mem AC	GCST90001403	ebi-a-GCST90001403
Relative count	B cell	BC_Trait23	PB/PC %B cell	GCST90001404	ebi-a-GCST90001404
Absolute count	B cell	BC_Trait24	PB/PC AC	GCST90001405	ebi-a-GCST90001405
Relative count	B cell	BC_Trait25	Memory B cell %B cell	GCST90001406	ebi-a-GCST90001406
Absolute count	B cell	BC_Trait26	Memory B cell AC	GCST90001407	ebi-a-GCST90001407
Relative count	B cell	BC_Trait27	Naive-mature B cell %B cell	GCST90001408	ebi-a-GCST90001408
Absolute count	B cell	BC_Trait28	Naive-mature B cell AC	GCST90001409	ebi-a-GCST90001409
Relative count	B cell	BC_Trait3	IgD- CD38br %B cell	GCST90001410	ebi-a-GCST90001410
Relative count	B cell	BC_Trait31	IgD+ CD24+ %B cell	GCST90001411	ebi-a-GCST90001411
Absolute count	B cell	BC_Trait32	IgD+ CD24+ AC	GCST90001412	ebi-a-GCST90001412
Relative count	B cell	BC_Trait33	IgD- CD24- %B cell	GCST90001413	ebi-a-GCST90001413
Absolute count	B cell	BC_Trait34	IgD- CD24- AC	GCST90001414	ebi-a-GCST90001414
Relative count	B cell	BC_Trait35	IgD+ CD24- %B cell	GCST90001415	ebi-a-GCST90001415
Absolute count	B cell	BC_Trait36	IgD+ CD24- AC	GCST90001416	ebi-a-GCST90001416
Relative count	B cell	BC_Trait37	CD24+ CD27+ %B cell	GCST90001417	ebi-a-GCST90001417
Absolute count	B cell	BC_Trait38	CD24+ CD27+ AC	GCST90001418	ebi-a-GCST90001418
Relative count	B cell	BC_Trait39	CD20- %B cell	GCST90001419	ebi-a-GCST90001419
Absolute count	B cell	BC_Trait4	IgD- CD38br AC	GCST90001420	ebi-a-GCST90001420
Absolute count	B cell	BC_Trait40	CD20- AC	GCST90001421	ebi-a-GCST90001421
Relative count	B cell	BC_Trait43	CD20- CD38- %B cell	GCST90001422	ebi-a-GCST90001422
Absolute count	B cell	BC_Trait44	CD20- CD38- AC	GCST90001423	ebi-a-GCST90001423
Relative count	B cell	BC_Trait46	IgD+ %Lymphocyte	GCST90001424	ebi-a-GCST90001424
Relative count	B cell	BC_Trait47	IgD- CD38br %lymphocyte	GCST90001425	ebi-a-GCST90001425
Relative count	B cell	BC_Trait48	IgD- CD38dim %lymphocyte	GCST90001426	ebi-a-GCST90001426
Relative count	B cell	BC_Trait49	IgD- CD38- %lymphocyte	GCST90001427	ebi-a-GCST90001427
Relative count	B cell	BC_Trait5	IgD- CD38dim %B cell	GCST90001428	ebi-a-GCST90001428
Relative count	B cell	BC_Trait50	IgD+ CD38br %lymphocyte	GCST90001429	ebi-a-GCST90001429
Relative count	B cell	BC_Trait51	IgD+ CD38dim %lymphocyte	GCST90001430	ebi-a-GCST90001430
Relative count	B cell	BC_Trait52	IgD+ CD38- %lymphocyte	GCST90001431	ebi-a-GCST90001431
Relative count	B cell	BC_Trait54	Unsw Mem %lymphocyte	GCST90001432	ebi-a-GCST90001432
Relative count	B cell	BC_Trait55	IgD- CD27- %lymphocyte	GCST90001433	ebi-a-GCST90001433
Relative count	B cell	BC_Trait56	Sw mem %lymphocyte	GCST90001434	ebi-a-GCST90001434
Relative count	B cell	BC_Trait57	PB/PC %lymphocyte	GCST90001435	ebi-a-GCST90001435
Relative count	B cell	BC_Trait58	Memory B cell %lymphocyte	GCST90001436	ebi-a-GCST90001436
Relative count	B cell	BC_Trait59	Naive-mature B cell %lymphocyte	GCST90001437	ebi-a-GCST90001437
Absolute count	B cell	BC_Trait6	IgD- CD38dim AC	GCST90001438	ebi-a-GCST90001438
Relative count	B cell	BC_Trait61	IgD+ CD24+ %lymphocyte	GCST90001439	ebi-a-GCST90001439
Relative count	B cell	BC_Trait62	IgD- CD24- %lymphocyte	GCST90001440	ebi-a-GCST90001440
Relative count	B cell	BC_Trait63	IgD+ CD24- %lymphocyte	GCST90001441	ebi-a-GCST90001441
Relative count	B cell	BC_Trait64	CD24+ CD27+ %lymphocyte	GCST90001442	ebi-a-GCST90001442
Relative count	B cell	BC_Trait65	CD20- %lymphocyte	GCST90001443	ebi-a-GCST90001443
Relative count	B cell	BC_Trait67	CD20- CD38- %lymphocyte	GCST90001444	ebi-a-GCST90001444
Relative count	B cell	BC_Trait7	IgD- CD38- %B cell	GCST90001445	ebi-a-GCST90001445
Absolute count	B cell	BC_Trait8	IgD- CD38- AC	GCST90001446	ebi-a-GCST90001446
Relative count	B cell	BC_Trait9	IgD+ CD38br %B cell	GCST90001447	ebi-a-GCST90001447
Absolute count	cDC	DC_Trait524	CD11c+ monocyte AC	GCST90001448	ebi-a-GCST90001448
Relative count	cDC	DC_Trait525	CD11c+ monocyte %monocyte	GCST90001449	ebi-a-GCST90001449
Absolute count	cDC	DC_Trait526	CD62L- monocyte AC	GCST90001450	ebi-a-GCST90001450
Relative count	cDC	DC_Trait527	CD62L- monocyte %monocyte	GCST90001451	ebi-a-GCST90001451
Absolute count	cDC	DC_Trait530	CD11c+ CD62L- monocyte AC	GCST90001452	ebi-a-GCST90001452
Relative count	cDC	DC_Trait531	CD11c+ CD62L- monocyte %monocyte	GCST90001453	ebi-a-GCST90001453
Absolute count	cDC	DC_Trait532	CD62L- HLA DR++ monocyte AC	GCST90001454	ebi-a-GCST90001454
Relative count	cDC	DC_Trait533	CD62L- HLA DR++ monocyte %monocyte	GCST90001455	ebi-a-GCST90001455
Absolute count	cDC	DC_Trait534	CD11c+ HLA DR++ monocyte AC	GCST90001456	ebi-a-GCST90001456
Relative count	cDC	DC_Trait535	CD11c+ HLA DR++ monocyte %monocyte	GCST90001457	ebi-a-GCST90001457
Absolute count	cDC	f_DC_Trait502	Myeloid DC AC	GCST90001458	ebi-a-GCST90001458
Relative count	cDC	f_DC_Trait503	Myeloid DC %DC	GCST90001459	ebi-a-GCST90001459
Absolute count	cDC	f_DC_Trait504	Plasmacytoid DC AC	GCST90001460	ebi-a-GCST90001460
Absolute count	cDC	f_DC_Trait505	DC AC	GCST90001461	ebi-a-GCST90001461
Absolute count	cDC	f_DC_Trait508	CD62L- DC AC	GCST90001462	ebi-a-GCST90001462
Relative count	cDC	f_DC_Trait509	CD62L- DC %DC	GCST90001463	ebi-a-GCST90001463
Absolute count	cDC	f_DC_Trait512	CD86+ myeloid DC AC	GCST90001464	ebi-a-GCST90001464
Relative count	cDC	f_DC_Trait513	CD86+ myeloid DC %DC	GCST90001465	ebi-a-GCST90001465
Absolute count	cDC	f_DC_Trait514	CD86+ plasmacytoid DC AC	GCST90001466	ebi-a-GCST90001466
Relative count	cDC	f_DC_Trait515	CD86+ plasmacytoid DC %DC	GCST90001467	ebi-a-GCST90001467
Absolute count	cDC	f_DC_Trait516	CD62L- myeloid DC AC	GCST90001468	ebi-a-GCST90001468
Relative count	cDC	f_DC_Trait517	CD62L- myeloid DC %DC	GCST90001469	ebi-a-GCST90001469
Absolute count	cDC	f_DC_Trait518	CD62L- plasmacytoid DC AC	GCST90001470	ebi-a-GCST90001470
Relative count	cDC	f_DC_Trait519	CD62L- plasmacytoid DC %DC	GCST90001471	ebi-a-GCST90001471
Absolute count	cDC	f_DC_Trait520	CD62L- CD86+ myeloid DC AC	GCST90001472	ebi-a-GCST90001472
Relative count	cDC	f_DC_Trait521	CD62L- CD86+ myeloid DC %DC	GCST90001473	ebi-a-GCST90001473
Relative count	cDC	f_DC_Trait522	Plasmacytoid DC %DC	GCST90001474	ebi-a-GCST90001474
Relative count	TBNK	f_MONO_Trait503	HLA DR++ monocyte %monocyte	GCST90001475	ebi-a-GCST90001475
Relative count	TBNK	f_MONO_Trait504	HLA DR++ monocyte %leukocyte	GCST90001476	ebi-a-GCST90001476
Absolute count	TBNK	f_MONO_Trait505	HLA DR++ monocyte AC	GCST90001477	ebi-a-GCST90001477
Relative count	Treg	f_Treg_Trait501	CD4 Treg %CD4	GCST90001478	ebi-a-GCST90001478
Relative count	Treg	f_Treg_Trait502	CD4 Treg %T cell	GCST90001479	ebi-a-GCST90001479
Absolute count	Treg	f_Treg_Trait503	Resting Treg AC	GCST90001480	ebi-a-GCST90001480
Relative count	Treg	f_Treg_Trait504	Resting Treg % CD4 Treg	GCST90001481	ebi-a-GCST90001481
Relative count	Treg	f_Treg_Trait505	Resting Treg %CD4	GCST90001482	ebi-a-GCST90001482
Absolute count	Treg	f_Treg_Trait506	CD39+ resting Treg AC	GCST90001483	ebi-a-GCST90001483
Relative count	Treg	f_Treg_Trait507	CD39+ resting Treg %resting Treg	GCST90001484	ebi-a-GCST90001484
Relative count	Treg	f_Treg_Trait508	CD39+ resting Treg % CD4 Treg	GCST90001485	ebi-a-GCST90001485
Absolute count	Treg	f_Treg_Trait509	Activated Treg AC	GCST90001486	ebi-a-GCST90001486
Relative count	Treg	f_Treg_Trait510	Activated Treg %CD4 Treg	GCST90001487	ebi-a-GCST90001487
Relative count	Treg	f_Treg_Trait511	Activated Treg %CD4	GCST90001488	ebi-a-GCST90001488
Absolute count	Treg	f_Treg_Trait512	CD39+ activated Treg AC	GCST90001489	ebi-a-GCST90001489
Relative count	Treg	f_Treg_Trait513	CD39+ activated Treg %activated Treg	GCST90001490	ebi-a-GCST90001490
Relative count	Treg	f_Treg_Trait514	CD39+ activated Treg %CD4 Treg	GCST90001491	ebi-a-GCST90001491
Absolute count	Treg	f_Treg_Trait515	Secreting Treg AC	GCST90001492	ebi-a-GCST90001492
Relative count	Treg	f_Treg_Trait516	Secreting Treg % CD4 Treg	GCST90001493	ebi-a-GCST90001493
Relative count	Treg	f_Treg_Trait517	Secreting Treg %CD4	GCST90001494	ebi-a-GCST90001494
Absolute count	Treg	f_Treg_Trait518	CD39+ secreting Treg AC	GCST90001495	ebi-a-GCST90001495
Relative count	Treg	f_Treg_Trait519	CD39+ secreting Treg %secreting Treg	GCST90001496	ebi-a-GCST90001496
Relative count	Treg	f_Treg_Trait520	CD39+ secreting Treg %CD4 Treg	GCST90001497	ebi-a-GCST90001497
Absolute count	Treg	f_Treg_Trait521	Activated & resting Treg AC	GCST90001498	ebi-a-GCST90001498
Relative count	Treg	f_Treg_Trait522	Activated & resting Treg % CD4 Treg	GCST90001499	ebi-a-GCST90001499
Relative count	Treg	f_Treg_Trait523	Activated & resting Treg %CD4+	GCST90001500	ebi-a-GCST90001500
Absolute count	Treg	f_Treg_Trait527	Activated & secreting Treg AC	GCST90001501	ebi-a-GCST90001501
Relative count	Treg	f_Treg_Trait528	Activated & secreting Treg %CD4 Treg	GCST90001502	ebi-a-GCST90001502
Relative count	Treg	f_Treg_Trait529	Activated & secreting Treg %CD4+	GCST90001503	ebi-a-GCST90001503
Absolute count	Treg	f_Treg_Trait533	CD25hi AC	GCST90001504	ebi-a-GCST90001504
Relative count	Treg	f_Treg_Trait534	CD25hi %CD4+	GCST90001505	ebi-a-GCST90001505
Relative count	Treg	f_Treg_Trait535	CD25hi %T cell	GCST90001506	ebi-a-GCST90001506
Absolute count	Treg	f_Treg_Trait536	CD25hi CD45RA+ CD4 not Treg AC	GCST90001507	ebi-a-GCST90001507
Relative count	Treg	f_Treg_Trait537	CD25hi CD45RA+ CD4 not Treg %CD4+	GCST90001508	ebi-a-GCST90001508
Relative count	Treg	f_Treg_Trait538	CD25hi CD45RA+ CD4 not Treg %T cell	GCST90001509	ebi-a-GCST90001509
Absolute count	Treg	f_Treg_Trait539	CD25hi CD45RA- CD4 not Treg AC	GCST90001510	ebi-a-GCST90001510
Relative count	Treg	f_Treg_Trait540	CD25hi CD45RA- CD4 not Treg %CD4+	GCST90001511	ebi-a-GCST90001511
Relative count	Treg	f_Treg_Trait541	CD25hi CD45RA- CD4 not Treg %T cell	GCST90001512	ebi-a-GCST90001512
Absolute count	Treg	f_Treg_Trait542	CD4 Treg AC	GCST90001513	ebi-a-GCST90001513
Absolute count	Myeloid cell	MDSC_Trait1	HSC AC	GCST90001514	ebi-a-GCST90001514
Absolute count	Myeloid cell	MDSC_Trait10	Im MDSC AC	GCST90001515	ebi-a-GCST90001515
Relative count	Myeloid cell	MDSC_Trait11	Im MDSC %CD33dim HLA DR- CD66b-	GCST90001516	ebi-a-GCST90001516
Absolute count	Myeloid cell	MDSC_Trait12	CD33br HLA DR+ AC	GCST90001517	ebi-a-GCST90001517
Absolute count	Myeloid cell	MDSC_Trait13	CD33br HLA DR+ CD14- AC	GCST90001518	ebi-a-GCST90001518
Relative count	Myeloid cell	MDSC_Trait14	CD33br HLA DR+ CD14- %CD33br HLA DR+	GCST90001519	ebi-a-GCST90001519
Absolute count	Myeloid cell	MDSC_Trait15	CD33br HLA DR+ CD14dim AC	GCST90001520	ebi-a-GCST90001520
Relative count	Myeloid cell	MDSC_Trait16	CD33br HLA DR+ CD14dim %CD33br HLA DR+	GCST90001521	ebi-a-GCST90001521
Absolute count	Myeloid cell	MDSC_Trait22	CD33- HLA DR- AC	GCST90001522	ebi-a-GCST90001522
Absolute count	Myeloid cell	MDSC_Trait23	CD33- HLA DR+ AC	GCST90001523	ebi-a-GCST90001523
Absolute count	Myeloid cell	MDSC_Trait24	Gr MDSC AC	GCST90001524	ebi-a-GCST90001524
Absolute count	Myeloid cell	MDSC_Trait25	CD33dim HLA DR+ CD11b+ AC	GCST90001525	ebi-a-GCST90001525
Relative count	Myeloid cell	MDSC_Trait26	CD33dim HLA DR+ CD11b+ %CD33dim HLA DR+	GCST90001526	ebi-a-GCST90001526
Absolute count	Myeloid cell	MDSC_Trait27	CD33dim HLA DR+ CD11b- AC	GCST90001527	ebi-a-GCST90001527
Relative count	Myeloid cell	MDSC_Trait28	CD33dim HLA DR+ CD11b- %CD33dim HLA DR+	GCST90001528	ebi-a-GCST90001528
Absolute count	Myeloid cell	MDSC_Trait3	CD66b++ myeloid cell AC	GCST90001529	ebi-a-GCST90001529
Absolute count	Myeloid cell	MDSC_Trait4	Mo MDSC AC	GCST90001530	ebi-a-GCST90001530
Absolute count	Myeloid cell	MDSC_Trait5	CD33dim HLA DR- AC	GCST90001531	ebi-a-GCST90001531
Absolute count	Myeloid cell	MDSC_Trait8	Basophil AC	GCST90001532	ebi-a-GCST90001532
Relative count	Myeloid cell	MDSC_Trait9	Basophil %CD33dim HLA DR- CD66b-	GCST90001533	ebi-a-GCST90001533
Absolute count	Maturation stages of T cell	MT_ry_Trait514	CD45RA- CD4+ AC	GCST90001534	ebi-a-GCST90001534
Relative count	Maturation stages of T cell	MT_ry_Trait515	CD45RA- CD4+ %CD4+	GCST90001535	ebi-a-GCST90001535
Relative count	Maturation stages of T cell	MT_ry_Trait516	CD45RA- CD4+ %T cell	GCST90001536	ebi-a-GCST90001536
Absolute count	Maturation stages of T cell	MT_Trait503	CM CD4+ AC	GCST90001537	ebi-a-GCST90001537
Relative count	Maturation stages of T cell	MT_Trait504	CM CD4+ %CD4+	GCST90001538	ebi-a-GCST90001538
Relative count	Maturation stages of T cell	MT_Trait505	CM CD4+ %T cell	GCST90001539	ebi-a-GCST90001539
Absolute count	Maturation stages of T cell	MT_Trait506	Naive CD4+ AC	GCST90001540	ebi-a-GCST90001540
Relative count	Maturation stages of T cell	MT_Trait507	Naive CD4+ %CD4+	GCST90001541	ebi-a-GCST90001541
Absolute count	Maturation stages of T cell	MT_Trait508	EM CD4+ AC	GCST90001542	ebi-a-GCST90001542
Relative count	Maturation stages of T cell	MT_Trait509	EM CD4+ %CD4+	GCST90001543	ebi-a-GCST90001543
Relative count	Maturation stages of T cell	MT_Trait510	EM CD4+ %T cell	GCST90001544	ebi-a-GCST90001544
Absolute count	Maturation stages of T cell	MT_Trait511	TD CD4+ AC	GCST90001545	ebi-a-GCST90001545
Relative count	Maturation stages of T cell	MT_Trait512	TD CD4+ %CD4+	GCST90001546	ebi-a-GCST90001546
Relative count	Maturation stages of T cell	MT_Trait513	TD CD4+ %T cell	GCST90001547	ebi-a-GCST90001547
Absolute count	Maturation stages of T cell	MT_Trait522	CM CD8br AC	GCST90001548	ebi-a-GCST90001548
Relative count	Maturation stages of T cell	MT_Trait523	CM CD8br %CD8br	GCST90001549	ebi-a-GCST90001549
Relative count	Maturation stages of T cell	MT_Trait524	CM CD8br %T cell	GCST90001550	ebi-a-GCST90001550
Absolute count	Maturation stages of T cell	MT_Trait525	Naive CD8br AC	GCST90001551	ebi-a-GCST90001551
Relative count	Maturation stages of T cell	MT_Trait526	Naive CD8br %CD8br	GCST90001552	ebi-a-GCST90001552
Relative count	Maturation stages of T cell	MT_Trait527	Naive CD8br %T cell	GCST90001553	ebi-a-GCST90001553
Absolute count	Maturation stages of T cell	MT_Trait528	EM CD8br AC	GCST90001554	ebi-a-GCST90001554
Relative count	Maturation stages of T cell	MT_Trait529	EM CD8br %CD8br	GCST90001555	ebi-a-GCST90001555
Relative count	Maturation stages of T cell	MT_Trait530	EM CD8br %T cell	GCST90001556	ebi-a-GCST90001556
Absolute count	Maturation stages of T cell	MT_Trait531	TD CD8br AC	GCST90001557	ebi-a-GCST90001557
Relative count	Maturation stages of T cell	MT_Trait532	TD CD8br %CD8br	GCST90001558	ebi-a-GCST90001558
Relative count	Maturation stages of T cell	MT_Trait533	TD CD8br %T cell	GCST90001559	ebi-a-GCST90001559
Absolute count	Maturation stages of T cell	MT_Trait537	CD45RA+ CD8br AC	GCST90001560	ebi-a-GCST90001560
Relative count	Maturation stages of T cell	MT_Trait538	CD45RA+ CD8br %CD8br	GCST90001561	ebi-a-GCST90001561
Relative count	Maturation stages of T cell	MT_Trait539	CD45RA+ CD8br %T cell	GCST90001562	ebi-a-GCST90001562
Absolute count	Maturation stages of T cell	MT_Trait542	CM DN (CD4-CD8-) AC	GCST90001563	ebi-a-GCST90001563
Relative count	Maturation stages of T cell	MT_Trait543	CM DN (CD4-CD8-) %DN	GCST90001564	ebi-a-GCST90001564
Relative count	Maturation stages of T cell	MT_Trait544	CM DN (CD4-CD8-) %T cell	GCST90001565	ebi-a-GCST90001565
Absolute count	Maturation stages of T cell	MT_Trait545	Naive DN (CD4-CD8-) AC	GCST90001566	ebi-a-GCST90001566
Relative count	Maturation stages of T cell	MT_Trait546	Naive DN (CD4-CD8-) %DN	GCST90001567	ebi-a-GCST90001567
Relative count	Maturation stages of T cell	MT_Trait547	Naive DN (CD4-CD8-) %T cell	GCST90001568	ebi-a-GCST90001568
Absolute count	Maturation stages of T cell	MT_Trait548	EM DN (CD4-CD8-) AC	GCST90001569	ebi-a-GCST90001569
Relative count	Maturation stages of T cell	MT_Trait549	EM DN (CD4-CD8-) %DN	GCST90001570	ebi-a-GCST90001570
Relative count	Maturation stages of T cell	MT_Trait550	EM DN (CD4-CD8-) %T cell	GCST90001571	ebi-a-GCST90001571
Absolute count	Maturation stages of T cell	MT_Trait551	TD DN (CD4-CD8-) AC	GCST90001572	ebi-a-GCST90001572
Relative count	Maturation stages of T cell	MT_Trait552	TD DN (CD4-CD8-) %DN	GCST90001573	ebi-a-GCST90001573
Relative count	Maturation stages of T cell	MT_Trait553	TD DN (CD4-CD8-) %T cell	GCST90001574	ebi-a-GCST90001574
Relative count	Maturation stages of T cell	MT_Trait560	Naive CD4+ %T cell	GCST90001575	ebi-a-GCST90001575
Relative count	B cell	N_BC_Trait3	Transitional %B cell	GCST90001576	ebi-a-GCST90001576
Absolute count	B cell	N_BC_Trait4	Transitional AC	GCST90001577	ebi-a-GCST90001577
Relative count	B cell	N_BC_Trait6	Transitional %lymphocyte	GCST90001578	ebi-a-GCST90001578
Absolute count	Monocyte	N_MONO_Trait501	CD14- CD16+ monocyte AC	GCST90001579	ebi-a-GCST90001579
Absolute count	Monocyte	N_MONO_Trait503	CD14+ CD16+ monocyte AC	GCST90001580	ebi-a-GCST90001580
Absolute count	Monocyte	N_MONO_Trait505	CD14- CD16- AC	GCST90001581	ebi-a-GCST90001581
Absolute count	Monocyte	N_MONO_Trait507	CD14+ CD16- monocyte AC	GCST90001582	ebi-a-GCST90001582
Absolute count	Monocyte	N_MONO_Trait513	Monocyte AC	GCST90001583	ebi-a-GCST90001583
Relative count	Monocyte	N_MONO_Trait514	CD14- CD16+ monocyte %monocyte	GCST90001584	ebi-a-GCST90001584
Relative count	Monocyte	N_MONO_Trait515	CD14+ CD16+ monocyte %monocyte	GCST90001585	ebi-a-GCST90001585
Relative count	Monocyte	N_MONO_Trait516	CD14+ CD16- monocyte %monocyte	GCST90001586	ebi-a-GCST90001586
Relative count	Monocyte	N_MONO_Trait517	CD16+ monocyte %monocyte	GCST90001587	ebi-a-GCST90001587
Relative count	TBNK	RATIO_CD3_B	T/B	GCST90001588	ebi-a-GCST90001588
Relative count	TBNK	RATIO_CD4_CD8B	CD4/CD8br	GCST90001589	ebi-a-GCST90001589
Absolute count	TBNK	TB_ry_Trait512	CD4+ AC	GCST90001590	ebi-a-GCST90001590
Relative count	TBNK	TB_ry_Trait513	CD4+ %T cell	GCST90001591	ebi-a-GCST90001591
Absolute count	TBNK	TB_ry_Trait515	CD8br AC	GCST90001592	ebi-a-GCST90001592
Relative count	TBNK	TB_ry_Trait516	CD8br %T cell	GCST90001593	ebi-a-GCST90001593
Absolute count	TBNK	TB_ry_Trait518	DP (CD4+CD8+) AC	GCST90001594	ebi-a-GCST90001594
Relative count	TBNK	TB_ry_Trait519	DP (CD4+CD8+) %T cell	GCST90001595	ebi-a-GCST90001595
Absolute count	TBNK	TB_ry_Trait524	CD8dim AC	GCST90001596	ebi-a-GCST90001596
Relative count	TBNK	TB_ry_Trait525	CD8dim %T cell	GCST90001597	ebi-a-GCST90001597
Absolute count	TBNK	TB_ry_Trait527	DN (CD4-CD8-) AC	GCST90001598	ebi-a-GCST90001598
Relative count	TBNK	TB_ry_Trait528	DN (CD4-CD8-) %T cell	GCST90001599	ebi-a-GCST90001599
Absolute count	TBNK	TB_Trait501	Leukocyte AC	GCST90001600	ebi-a-GCST90001600
Absolute count	TBNK	TB_Trait507	Lymphocyte AC	GCST90001601	ebi-a-GCST90001601
Relative count	TBNK	TB_Trait508	Lymphocyte %leukocyte	GCST90001602	ebi-a-GCST90001602
Absolute count	TBNK	TB_Trait509	T cell AC	GCST90001603	ebi-a-GCST90001603
Relative count	TBNK	TB_Trait510	T cell %lymphocyte	GCST90001604	ebi-a-GCST90001604
Relative count	TBNK	TB_Trait511	T cell %leukocyte	GCST90001605	ebi-a-GCST90001605
Relative count	TBNK	TB_Trait514	CD4+ %leukocyte	GCST90001606	ebi-a-GCST90001606
Relative count	TBNK	TB_Trait517	CD8br %leukocyte	GCST90001607	ebi-a-GCST90001607
Relative count	TBNK	TB_Trait520	DP (CD4+CD8+) %leukocyte	GCST90001608	ebi-a-GCST90001608
Absolute count	TBNK	TB_Trait521	CD4+ CD8dim AC	GCST90001609	ebi-a-GCST90001609
Relative count	TBNK	TB_Trait522	CD4+ CD8dim %lymphocyte	GCST90001610	ebi-a-GCST90001610
Relative count	TBNK	TB_Trait523	CD4+ CD8dim %leukocyte	GCST90001611	ebi-a-GCST90001611
Relative count	TBNK	TB_Trait526	CD8dim %leukocyte	GCST90001612	ebi-a-GCST90001612
Relative count	TBNK	TB_Trait529	DN (CD4-CD8-) %leukocyte	GCST90001613	ebi-a-GCST90001613
Relative count	TBNK	TB_Trait532	CD8br and CD8dim %leukocyte	GCST90001614	ebi-a-GCST90001614
Absolute count	TBNK	TB_Trait533	TCRgd AC	GCST90001615	ebi-a-GCST90001615
Relative count	TBNK	TB_Trait534	TCRgd %T cell	GCST90001616	ebi-a-GCST90001616
Relative count	TBNK	TB_Trait535	TCRgd %lymphocyte	GCST90001617	ebi-a-GCST90001617
Absolute count	TBNK	TB_Trait536	HLA DR+ T cell AC	GCST90001618	ebi-a-GCST90001618
Relative count	TBNK	TB_Trait537	HLA DR+ T cell%T cell	GCST90001619	ebi-a-GCST90001619
Relative count	TBNK	TB_Trait538	HLA DR+ T cell%lymphocyte	GCST90001620	ebi-a-GCST90001620
Absolute count	TBNK	TB_Trait539	NKT AC	GCST90001621	ebi-a-GCST90001621
Relative count	TBNK	TB_Trait540	NKT %T cell	GCST90001622	ebi-a-GCST90001622
Relative count	TBNK	TB_Trait541	NKT %lymphocyte	GCST90001623	ebi-a-GCST90001623
Absolute count	TBNK	TB_Trait542	HLA DR+ CD4+ AC	GCST90001624	ebi-a-GCST90001624
Relative count	TBNK	TB_Trait543	HLA DR+ CD4+ %T cell	GCST90001625	ebi-a-GCST90001625
Relative count	TBNK	TB_Trait544	HLA DR+ CD4+ %lymphocyte	GCST90001626	ebi-a-GCST90001626
Absolute count	TBNK	TB_Trait545	HLA DR+ CD8br AC	GCST90001627	ebi-a-GCST90001627
Relative count	TBNK	TB_Trait546	HLA DR+ CD8br %T cell	GCST90001628	ebi-a-GCST90001628
Relative count	TBNK	TB_Trait547	HLA DR+ CD8br %lymphocyte	GCST90001629	ebi-a-GCST90001629
Absolute count	TBNK	TB_Trait548	CD8br NKT AC	GCST90001630	ebi-a-GCST90001630
Relative count	TBNK	TB_Trait549	CD8br NKT %T cell	GCST90001631	ebi-a-GCST90001631
Relative count	TBNK	TB_Trait550	CD8br NKT %lymphocyte	GCST90001632	ebi-a-GCST90001632
Absolute count	TBNK	TB_Trait551	CD8dim NKT AC	GCST90001633	ebi-a-GCST90001633
Relative count	TBNK	TB_Trait552	CD8dim NKT %T cell	GCST90001634	ebi-a-GCST90001634
Relative count	TBNK	TB_Trait553	CD8dim NKT %lymphocyte	GCST90001635	ebi-a-GCST90001635
Absolute count	TBNK	TB_Trait554	DN (CD4-CD8-) NKT AC	GCST90001636	ebi-a-GCST90001636
Relative count	TBNK	TB_Trait555	DN (CD4-CD8-) NKT %T cell	GCST90001637	ebi-a-GCST90001637
Relative count	TBNK	TB_Trait556	DN (CD4-CD8-) NKT %lymphocyte	GCST90001638	ebi-a-GCST90001638
Absolute count	TBNK	TB_Trait560	CD3- lymphocyte AC	GCST90001639	ebi-a-GCST90001639
Relative count	TBNK	TB_Trait561	CD3- lymphocyte %lymphocyte	GCST90001640	ebi-a-GCST90001640
Relative count	TBNK	TB_Trait562	CD3- lymphocyte %leukocyte	GCST90001641	ebi-a-GCST90001641
Absolute count	TBNK	TB_Trait563	B cell AC	GCST90001642	ebi-a-GCST90001642
Relative count	TBNK	TB_Trait564	B cell % CD3- lymphocyte	GCST90001643	ebi-a-GCST90001643
Relative count	TBNK	TB_Trait565	B cell %lymphocyte	GCST90001644	ebi-a-GCST90001644
Absolute count	TBNK	TB_Trait566	NK AC	GCST90001645	ebi-a-GCST90001645
Relative count	TBNK	TB_Trait567	NK %CD3- lymphocyte	GCST90001646	ebi-a-GCST90001646
Relative count	TBNK	TB_Trait568	NK %lymphocyte	GCST90001647	ebi-a-GCST90001647
Absolute count	TBNK	TB_Trait569	HLA DR+ NK AC	GCST90001648	ebi-a-GCST90001648
Relative count	TBNK	TB_Trait570	HLA DR+ NK %NK	GCST90001649	ebi-a-GCST90001649
Relative count	TBNK	TB_Trait571	HLA DR+ NK %CD3- lymphocyte	GCST90001650	ebi-a-GCST90001650
Absolute count	TBNK	TB_Trait575	Granulocyte AC	GCST90001651	ebi-a-GCST90001651
Relative count	TBNK	TB_Trait576	Granulocyte %leukocyte	GCST90001652	ebi-a-GCST90001652
Relative count	Treg	Treg_Trait505	CD28- DN (CD4-CD8-) %DN	GCST90001653	ebi-a-GCST90001653
Absolute count	Treg	Treg_Trait506	CD28- DN (CD4-CD8-) AC	GCST90001654	ebi-a-GCST90001654
Relative count	Treg	Treg_Trait507	CD28+ DN (CD4-CD8-) %T cell	GCST90001655	ebi-a-GCST90001655
Relative count	Treg	Treg_Trait508	CD28+ DN (CD4-CD8-) %DN	GCST90001656	ebi-a-GCST90001656
Absolute count	Treg	Treg_Trait509	CD28+ DN (CD4-CD8-) AC	GCST90001657	ebi-a-GCST90001657
Relative count	Treg	Treg_Trait512	CD39+ CD4+ %T cell	GCST90001658	ebi-a-GCST90001658
Relative count	Treg	Treg_Trait513	CD39+ CD4+ %CD4+	GCST90001659	ebi-a-GCST90001659
Absolute count	Treg	Treg_Trait514	CD39+ CD4+ AC	GCST90001660	ebi-a-GCST90001660
Relative count	Treg	Treg_Trait574	CD28- CD8dim %T cell	GCST90001661	ebi-a-GCST90001661
Relative count	Treg	Treg_Trait575	CD28- CD8dim %CD8dim	GCST90001662	ebi-a-GCST90001662
Absolute count	Treg	Treg_Trait576	CD28- CD8dim AC	GCST90001663	ebi-a-GCST90001663
Relative count	Treg	Treg_Trait577	CD28+ CD45RA+ CD8dim %T cell	GCST90001664	ebi-a-GCST90001664
Relative count	Treg	Treg_Trait578	CD28+ CD45RA+ CD8dim %CD8dim	GCST90001665	ebi-a-GCST90001665
Absolute count	Treg	Treg_Trait579	CD28+ CD45RA+ CD8dim AC	GCST90001666	ebi-a-GCST90001666
Relative count	Treg	Treg_Trait580	CD28+ CD45RA- CD8dim %T cell	GCST90001667	ebi-a-GCST90001667
Relative count	Treg	Treg_Trait581	CD28+ CD45RA- CD8dim %CD8dim	GCST90001668	ebi-a-GCST90001668
Absolute count	Treg	Treg_Trait582	CD28+ CD45RA- CD8dim AC	GCST90001669	ebi-a-GCST90001669
Relative count	Treg	Treg_Trait585	CD39+ CD8br %T cell	GCST90001670	ebi-a-GCST90001670
Relative count	Treg	Treg_Trait586	CD39+ CD8br %CD8br	GCST90001671	ebi-a-GCST90001671
Absolute count	Treg	Treg_Trait587	CD39+ CD8br AC	GCST90001672	ebi-a-GCST90001672
Relative count	Treg	Treg_Trait588	CD28- CD127- CD25++ CD8br %T cell	GCST90001673	ebi-a-GCST90001673
Relative count	Treg	Treg_Trait589	CD28- CD127- CD25++ CD8br %CD8br	GCST90001674	ebi-a-GCST90001674
Absolute count	Treg	Treg_Trait590	CD28- CD127- CD25++ CD8br AC	GCST90001675	ebi-a-GCST90001675
Relative count	Treg	Treg_Trait591	CD28- CD25++ CD8br %T cell	GCST90001676	ebi-a-GCST90001676
Relative count	Treg	Treg_Trait592	CD28- CD25++ CD8br %CD8br	GCST90001677	ebi-a-GCST90001677
Absolute count	Treg	Treg_Trait593	CD28- CD25++ CD8br AC	GCST90001678	ebi-a-GCST90001678
Relative count	Treg	Treg_Trait594	CD25++ CD8br %T cell	GCST90001679	ebi-a-GCST90001679
Relative count	Treg	Treg_Trait595	CD25++ CD8br %CD8br	GCST90001680	ebi-a-GCST90001680
Absolute count	Treg	Treg_Trait596	CD25++ CD8br AC	GCST90001681	ebi-a-GCST90001681
Relative count	Treg	Treg_Trait597	CD127- CD8br %T cell	GCST90001682	ebi-a-GCST90001682
Relative count	Treg	Treg_Trait598	CD127- CD8br %CD8br	GCST90001683	ebi-a-GCST90001683
Absolute count	Treg	Treg_Trait599	CD127- CD8br AC	GCST90001684	ebi-a-GCST90001684
Relative count	Treg	Treg_Trait600	CD28- CD8br %T cell	GCST90001685	ebi-a-GCST90001685
Relative count	Treg	Treg_Trait601	CD28- CD8br %CD8br	GCST90001686	ebi-a-GCST90001686
Absolute count	Treg	Treg_Trait602	CD28- CD8br AC	GCST90001687	ebi-a-GCST90001687
Relative count	Treg	Treg_Trait603	CD28+ CD45RA+ CD8br %T cell	GCST90001688	ebi-a-GCST90001688
Relative count	Treg	Treg_Trait604	CD28+ CD45RA+ CD8br %CD8br	GCST90001689	ebi-a-GCST90001689
Absolute count	Treg	Treg_Trait605	CD28+ CD45RA+ CD8br AC	GCST90001690	ebi-a-GCST90001690
Relative count	Treg	Treg_Trait606	CD28+ CD45RA- CD8br %T cell	GCST90001691	ebi-a-GCST90001691
Relative count	Treg	Treg_Trait607	CD28+ CD45RA- CD8br %CD8br	GCST90001692	ebi-a-GCST90001692
Absolute count	Treg	Treg_Trait608	CD28+ CD45RA- CD8br AC	GCST90001693	ebi-a-GCST90001693
Relative count	Treg	Treg_Trait611	CD28- DN (CD4-CD8-) %T cell	GCST90001694	ebi-a-GCST90001694
Absolute count	Treg	Treg_Trait700	CD45RA- CD28- CD8br AC	GCST90001695	ebi-a-GCST90001695
Relative count	Treg	Treg_Trait701	CD45RA- CD28- CD8br %CD8br	GCST90001696	ebi-a-GCST90001696
Relative count	Treg	Treg_Trait702	CD45RA- CD28- CD8br %T cell	GCST90001697	ebi-a-GCST90001697
Absolute count	Treg	Treg_Trait706	CD45RA+ CD28- CD8br AC	GCST90001698	ebi-a-GCST90001698
Relative count	Treg	Treg_Trait707	CD45RA+ CD28- CD8br %CD8br	GCST90001699	ebi-a-GCST90001699
Relative count	Treg	Treg_Trait708	CD45RA+ CD28- CD8br %T cell	GCST90001700	ebi-a-GCST90001700
MFI	B cell	Bcells.trait111	BAFF-R on CD20- CD38-	GCST90001701	ebi-a-GCST90001701
MFI	B cell	Bcells.trait112	BAFF-R on CD24+ CD27+	GCST90001702	ebi-a-GCST90001702
MFI	B cell	Bcells.trait137	BAFF-R on IgD+ CD24+	GCST90001703	ebi-a-GCST90001703
MFI	B cell	Bcells.trait138	BAFF-R on IgD+ CD24-	GCST90001704	ebi-a-GCST90001704
MFI	B cell	Bcells.trait139	BAFF-R on IgD+ CD38-	GCST90001705	ebi-a-GCST90001705
MFI	B cell	Bcells.trait140	BAFF-R on IgD+ CD38- naive	GCST90001706	ebi-a-GCST90001706
MFI	B cell	Bcells.trait141	BAFF-R on IgD+ CD38- unsw mem	GCST90001707	ebi-a-GCST90001707
MFI	B cell	Bcells.trait142	BAFF-R on IgD+ CD38br	GCST90001708	ebi-a-GCST90001708
MFI	B cell	Bcells.trait143	BAFF-R on IgD+ CD38dim	GCST90001709	ebi-a-GCST90001709
MFI	B cell	Bcells.trait147	BAFF-R on IgD- CD24-	GCST90001710	ebi-a-GCST90001710
MFI	B cell	Bcells.trait148	BAFF-R on IgD- CD27-	GCST90001711	ebi-a-GCST90001711
MFI	B cell	Bcells.trait149	BAFF-R on IgD- CD38-	GCST90001712	ebi-a-GCST90001712
MFI	B cell	Bcells.trait150	BAFF-R on IgD- CD38br	GCST90001713	ebi-a-GCST90001713
MFI	B cell	Bcells.trait151	BAFF-R on IgD- CD38dim	GCST90001714	ebi-a-GCST90001714
MFI	B cell	Bcells.trait154	BAFF-R on memory B cell	GCST90001715	ebi-a-GCST90001715
MFI	B cell	Bcells.trait156	BAFF-R on naive-mature B cell	GCST90001716	ebi-a-GCST90001716
MFI	B cell	Bcells.trait157	BAFF-R on unsw mem	GCST90001717	ebi-a-GCST90001717
MFI	B cell	Bcells.trait159	BAFF-R on sw mem	GCST90001718	ebi-a-GCST90001718
MFI	B cell	Bcells.trait160	BAFF-R on IgD+	GCST90001719	ebi-a-GCST90001719
MFI	B cell	Bcells.trait161	BAFF-R on transitional	GCST90001720	ebi-a-GCST90001720
MFI	B cell	Bcells.trait255	CD19 on CD20-	GCST90001721	ebi-a-GCST90001721
MFI	B cell	Bcells.trait282	CD19 on CD20- CD38-	GCST90001722	ebi-a-GCST90001722
MFI	B cell	Bcells.trait283	CD19 on CD24+ CD27+	GCST90001723	ebi-a-GCST90001723
MFI	B cell	Bcells.trait308	CD19 on IgD+ CD24+	GCST90001724	ebi-a-GCST90001724
MFI	B cell	Bcells.trait309	CD19 on IgD+ CD24-	GCST90001725	ebi-a-GCST90001725
MFI	B cell	Bcells.trait310	CD19 on IgD+ CD38-	GCST90001726	ebi-a-GCST90001726
MFI	B cell	Bcells.trait311	CD19 on IgD+ CD38- naive	GCST90001727	ebi-a-GCST90001727
MFI	B cell	Bcells.trait312	CD19 on IgD+ CD38- unsw mem	GCST90001728	ebi-a-GCST90001728
MFI	B cell	Bcells.trait313	CD19 on IgD+ CD38br	GCST90001729	ebi-a-GCST90001729
MFI	B cell	Bcells.trait314	CD19 on IgD+ CD38dim	GCST90001730	ebi-a-GCST90001730
MFI	B cell	Bcells.trait318	CD19 on IgD- CD24-	GCST90001731	ebi-a-GCST90001731
MFI	B cell	Bcells.trait319	CD19 on IgD- CD27-	GCST90001732	ebi-a-GCST90001732
MFI	B cell	Bcells.trait320	CD19 on IgD- CD38-	GCST90001733	ebi-a-GCST90001733
MFI	B cell	Bcells.trait321	CD19 on IgD- CD38br	GCST90001734	ebi-a-GCST90001734
MFI	B cell	Bcells.trait322	CD19 on IgD- CD38dim	GCST90001735	ebi-a-GCST90001735
MFI	B cell	Bcells.trait325	CD19 on memory B cell	GCST90001736	ebi-a-GCST90001736
MFI	B cell	Bcells.trait327	CD19 on naive-mature B cell	GCST90001737	ebi-a-GCST90001737
MFI	B cell	Bcells.trait328	CD19 on unsw mem	GCST90001738	ebi-a-GCST90001738
MFI	B cell	Bcells.trait329	CD19 on PB/PC	GCST90001739	ebi-a-GCST90001739
MFI	B cell	Bcells.trait331	CD19 on sw mem	GCST90001740	ebi-a-GCST90001740
MFI	B cell	Bcells.trait332	CD19 on IgD+	GCST90001741	ebi-a-GCST90001741
MFI	B cell	Bcells.trait333	CD19 on transitional	GCST90001742	ebi-a-GCST90001742
MFI	B cell	Bcells.trait335	CD20 on B cell	GCST90001743	ebi-a-GCST90001743
MFI	B cell	Bcells.trait354	CD20 on CD20- CD38-	GCST90001744	ebi-a-GCST90001744
MFI	B cell	Bcells.trait355	CD20 on CD24+ CD27+	GCST90001745	ebi-a-GCST90001745
MFI	B cell	Bcells.trait378	CD20 on IgD+ CD24+	GCST90001746	ebi-a-GCST90001746
MFI	B cell	Bcells.trait379	CD20 on IgD+ CD24-	GCST90001747	ebi-a-GCST90001747
MFI	B cell	Bcells.trait380	CD20 on IgD+ CD38-	GCST90001748	ebi-a-GCST90001748
MFI	B cell	Bcells.trait381	CD20 on IgD+ CD38- naive	GCST90001749	ebi-a-GCST90001749
MFI	B cell	Bcells.trait382	CD20 on IgD+ CD38- unsw mem	GCST90001750	ebi-a-GCST90001750
MFI	B cell	Bcells.trait383	CD20 on IgD+ CD38br	GCST90001751	ebi-a-GCST90001751
MFI	B cell	Bcells.trait384	CD20 on IgD+ CD38dim	GCST90001752	ebi-a-GCST90001752
MFI	B cell	Bcells.trait388	CD20 on IgD- CD24-	GCST90001753	ebi-a-GCST90001753
MFI	B cell	Bcells.trait389	CD20 on IgD- CD27-	GCST90001754	ebi-a-GCST90001754
MFI	B cell	Bcells.trait390	CD20 on IgD- CD38-	GCST90001755	ebi-a-GCST90001755
MFI	B cell	Bcells.trait391	CD20 on IgD- CD38br	GCST90001756	ebi-a-GCST90001756
MFI	B cell	Bcells.trait392	CD20 on IgD- CD38dim	GCST90001757	ebi-a-GCST90001757
MFI	B cell	Bcells.trait395	CD20 on memory B cell	GCST90001758	ebi-a-GCST90001758
MFI	B cell	Bcells.trait397	CD20 on naive-mature B cell	GCST90001759	ebi-a-GCST90001759
MFI	B cell	Bcells.trait398	CD20 on unsw mem	GCST90001760	ebi-a-GCST90001760
MFI	B cell	Bcells.trait399	CD20 on sw mem	GCST90001761	ebi-a-GCST90001761
MFI	B cell	Bcells.trait400	CD20 on IgD+	GCST90001762	ebi-a-GCST90001762
MFI	B cell	Bcells.trait401	CD20 on transitional	GCST90001763	ebi-a-GCST90001763
MFI	B cell	Bcells.trait418	CD24 on CD24+ CD27+	GCST90001764	ebi-a-GCST90001764
MFI	B cell	Bcells.trait438	CD24 on IgD+ CD24+	GCST90001765	ebi-a-GCST90001765
MFI	B cell	Bcells.trait439	CD24 on IgD+ CD38-	GCST90001766	ebi-a-GCST90001766
MFI	B cell	Bcells.trait441	CD24 on IgD+ CD38- unsw mem	GCST90001767	ebi-a-GCST90001767
MFI	B cell	Bcells.trait442	CD24 on IgD+ CD38br	GCST90001768	ebi-a-GCST90001768
MFI	B cell	Bcells.trait445	CD24 on IgD- CD38-	GCST90001769	ebi-a-GCST90001769
MFI	B cell	Bcells.trait446	CD24 on IgD- CD38dim	GCST90001770	ebi-a-GCST90001770
MFI	B cell	Bcells.trait448	CD24 on memory B cell	GCST90001771	ebi-a-GCST90001771
MFI	B cell	Bcells.trait449	CD24 on unsw mem	GCST90001772	ebi-a-GCST90001772
MFI	B cell	Bcells.trait450	CD24 on sw mem	GCST90001773	ebi-a-GCST90001773
MFI	B cell	Bcells.trait451	CD24 on transitional	GCST90001774	ebi-a-GCST90001774
MFI	B cell	Bcells.trait453	CD25 on B cell	GCST90001775	ebi-a-GCST90001775
MFI	B cell	Bcells.trait470	CD25 on CD20- CD38-	GCST90001776	ebi-a-GCST90001776
MFI	B cell	Bcells.trait471	CD25 on CD24+ CD27+	GCST90001777	ebi-a-GCST90001777
MFI	B cell	Bcells.trait490	CD25 on IgD+ CD24+	GCST90001778	ebi-a-GCST90001778
MFI	B cell	Bcells.trait491	CD25 on IgD+ CD24-	GCST90001779	ebi-a-GCST90001779
MFI	B cell	Bcells.trait492	CD25 on IgD+ CD38-	GCST90001780	ebi-a-GCST90001780
MFI	B cell	Bcells.trait493	CD25 on IgD+ CD38- naive	GCST90001781	ebi-a-GCST90001781
MFI	B cell	Bcells.trait494	CD25 on IgD+ CD38- unsw mem	GCST90001782	ebi-a-GCST90001782
MFI	B cell	Bcells.trait495	CD25 on IgD+ CD38br	GCST90001783	ebi-a-GCST90001783
MFI	B cell	Bcells.trait496	CD25 on IgD+ CD38dim	GCST90001784	ebi-a-GCST90001784
MFI	B cell	Bcells.trait500	CD25 on IgD- CD24-	GCST90001785	ebi-a-GCST90001785
MFI	B cell	Bcells.trait501	CD25 on IgD- CD27-	GCST90001786	ebi-a-GCST90001786
MFI	B cell	Bcells.trait502	CD25 on IgD- CD38-	GCST90001787	ebi-a-GCST90001787
MFI	B cell	Bcells.trait503	CD25 on IgD- CD38br	GCST90001788	ebi-a-GCST90001788
MFI	B cell	Bcells.trait504	CD25 on IgD- CD38dim	GCST90001789	ebi-a-GCST90001789
MFI	B cell	Bcells.trait506	CD25 on memory B cell	GCST90001790	ebi-a-GCST90001790
MFI	B cell	Bcells.trait508	CD25 on naive-mature B cell	GCST90001791	ebi-a-GCST90001791
MFI	B cell	Bcells.trait509	CD25 on unsw mem	GCST90001792	ebi-a-GCST90001792
MFI	B cell	Bcells.trait510	CD25 on sw mem	GCST90001793	ebi-a-GCST90001793
MFI	B cell	Bcells.trait511	CD25 on IgD+	GCST90001794	ebi-a-GCST90001794
MFI	B cell	Bcells.trait512	CD25 on transitional	GCST90001795	ebi-a-GCST90001795
MFI	B cell	Bcells.trait514	CD27 on CD20-	GCST90001796	ebi-a-GCST90001796
MFI	B cell	Bcells.trait536	CD27 on CD20- CD38-	GCST90001797	ebi-a-GCST90001797
MFI	B cell	Bcells.trait537	CD27 on CD24+ CD27+	GCST90001798	ebi-a-GCST90001798
MFI	B cell	Bcells.trait539	CD27 on T cell	GCST90001799	ebi-a-GCST90001799
MFI	B cell	Bcells.trait561	CD27 on IgD+ CD24+	GCST90001800	ebi-a-GCST90001800
MFI	B cell	Bcells.trait563	CD27 on IgD+ CD38- unsw mem	GCST90001801	ebi-a-GCST90001801
MFI	B cell	Bcells.trait565	CD27 on IgD- CD38-	GCST90001802	ebi-a-GCST90001802
MFI	B cell	Bcells.trait566	CD27 on IgD- CD38br	GCST90001803	ebi-a-GCST90001803
MFI	B cell	Bcells.trait567	CD27 on IgD- CD38dim	GCST90001804	ebi-a-GCST90001804
MFI	B cell	Bcells.trait570	CD27 on memory B cell	GCST90001805	ebi-a-GCST90001805
MFI	B cell	Bcells.trait571	CD27 on unsw mem	GCST90001806	ebi-a-GCST90001806
MFI	B cell	Bcells.trait572	CD27 on PB/PC	GCST90001807	ebi-a-GCST90001807
MFI	B cell	Bcells.trait574	CD27 on sw mem	GCST90001808	ebi-a-GCST90001808
MFI	B cell	Bcells.trait597	CD38 on CD20-	GCST90001809	ebi-a-GCST90001809
MFI	B cell	Bcells.trait619	CD38 on CD3- CD19-	GCST90001810	ebi-a-GCST90001810
MFI	B cell	Bcells.trait637	CD38 on IgD+ CD24-	GCST90001811	ebi-a-GCST90001811
MFI	B cell	Bcells.trait640	CD38 on IgD+ CD38br	GCST90001812	ebi-a-GCST90001812
MFI	B cell	Bcells.trait641	CD38 on IgD+ CD38dim	GCST90001813	ebi-a-GCST90001813
MFI	B cell	Bcells.trait643	CD38 on IgD- CD38br	GCST90001814	ebi-a-GCST90001814
MFI	B cell	Bcells.trait644	CD38 on IgD- CD38dim	GCST90001815	ebi-a-GCST90001815
MFI	B cell	Bcells.trait646	CD38 on naive-mature B cell	GCST90001816	ebi-a-GCST90001816
MFI	B cell	Bcells.trait647	CD38 on PB/PC	GCST90001817	ebi-a-GCST90001817
MFI	B cell	Bcells.trait649	CD38 on IgD+	GCST90001818	ebi-a-GCST90001818
MFI	B cell	Bcells.trait650	CD38 on transitional	GCST90001819	ebi-a-GCST90001819
MFI	B cell	Bcells.trait775	IgD on IgD+ CD24+	GCST90001820	ebi-a-GCST90001820
MFI	B cell	Bcells.trait776	IgD on IgD+ CD24-	GCST90001821	ebi-a-GCST90001821
MFI	B cell	Bcells.trait777	IgD on IgD+ CD38-	GCST90001822	ebi-a-GCST90001822
MFI	B cell	Bcells.trait779	IgD on IgD+ CD38- unsw mem	GCST90001823	ebi-a-GCST90001823
MFI	B cell	Bcells.trait780	IgD on IgD+ CD38br	GCST90001824	ebi-a-GCST90001824
MFI	B cell	Bcells.trait781	IgD on IgD+ CD38dim	GCST90001825	ebi-a-GCST90001825
MFI	B cell	Bcells.trait785	IgD on unsw mem	GCST90001826	ebi-a-GCST90001826
MFI	B cell	Bcells.trait786	IgD on IgD+	GCST90001827	ebi-a-GCST90001827
MFI	B cell	Bcells.trait787	IgD on transitional	GCST90001828	ebi-a-GCST90001828
MFI	B cell	Bcells.trait84	BAFF-R on B cell	GCST90001829	ebi-a-GCST90001829
MFI	B cell	Bcells.trait85	BAFF-R on CD20-	GCST90001830	ebi-a-GCST90001830
MFI	cDC	Blue.530.30.cDC.trait1	CD62L on CD62L+ myeloid DC	GCST90001831	ebi-a-GCST90001831
MFI	cDC	Blue.530.30.cDC.trait2	CD62L on CD62L+ plasmacytoid DC	GCST90001832	ebi-a-GCST90001832
MFI	cDC	Blue.530.30.cDC.trait3	CD62L on CD62L+ DC	GCST90001833	ebi-a-GCST90001833
MFI	cDC	Blue.530.30.cDC.trait4	CD62L on monocyte	GCST90001834	ebi-a-GCST90001834
MFI	cDC	Blue.530.30.cDC.trait5	CD62L on granulocyte	GCST90001835	ebi-a-GCST90001835
MFI	Myeloid cell	Blue.530.30.MDSC.trait1	CD66b on CD66b++ myeloid cell	GCST90001836	ebi-a-GCST90001836
MFI	Myeloid cell	Blue.530.30.MDSC.trait2	CD66b on Gr MDSC	GCST90001837	ebi-a-GCST90001837
MFI	Maturation stages of T cell	Blue.530.30.MT.trait10	CD3 on naive CD8br	GCST90001838	ebi-a-GCST90001838
MFI	Maturation stages of T cell	Blue.530.30.MT.trait11	CD3 on EM CD8br	GCST90001839	ebi-a-GCST90001839
MFI	Maturation stages of T cell	Blue.530.30.MT.trait12	CD3 on TD CD8br	GCST90001840	ebi-a-GCST90001840
MFI	Maturation stages of T cell	Blue.530.30.MT.trait3	CD3 on CM CD4+	GCST90001841	ebi-a-GCST90001841
MFI	Maturation stages of T cell	Blue.530.30.MT.trait4	CD3 on Naive CD4+	GCST90001842	ebi-a-GCST90001842
MFI	Maturation stages of T cell	Blue.530.30.MT.trait5	CD3 on EM CD4+	GCST90001843	ebi-a-GCST90001843
MFI	Maturation stages of T cell	Blue.530.30.MT.trait6	CD3 on TD CD4+	GCST90001844	ebi-a-GCST90001844
MFI	Maturation stages of T cell	Blue.530.30.MT.trait7	CD3 on CD45RA- CD4+	GCST90001845	ebi-a-GCST90001845
MFI	Maturation stages of T cell	Blue.530.30.MT.trait9	CD3 on CM CD8br	GCST90001846	ebi-a-GCST90001846
MFI	TBNK	Blue.530.30.TBNK.trait4	CD3 on HLA DR+ T cell	GCST90001847	ebi-a-GCST90001847
MFI	TBNK	Blue.530.30.TBNK.trait5	CD3 on NKT	GCST90001848	ebi-a-GCST90001848
MFI	TBNK	Blue.530.30.TBNK.trait6	CD3 on HLA DR+ CD4+	GCST90001849	ebi-a-GCST90001849
MFI	TBNK	Blue.530.30.TBNK.trait7	CD3 on HLA DR+ CD8br	GCST90001850	ebi-a-GCST90001850
MFI	Treg	Blue.530.30.Treg.trait1	CD3 on T cell	GCST90001851	ebi-a-GCST90001851
MFI	Treg	Blue.530.30.Treg.trait10	CD3 on CD39+ resting Treg	GCST90001852	ebi-a-GCST90001852
MFI	Treg	Blue.530.30.Treg.trait11	CD3 on activated Treg	GCST90001853	ebi-a-GCST90001853
MFI	Treg	Blue.530.30.Treg.trait12	CD3 on CD39+ activated Treg	GCST90001854	ebi-a-GCST90001854
MFI	Treg	Blue.530.30.Treg.trait13	CD3 on secreting Treg	GCST90001855	ebi-a-GCST90001855
MFI	Treg	Blue.530.30.Treg.trait14	CD3 on CD39+ secreting Treg	GCST90001856	ebi-a-GCST90001856
MFI	Treg	Blue.530.30.Treg.trait15	CD3 on activated & secreting Treg	GCST90001857	ebi-a-GCST90001857
MFI	Treg	Blue.530.30.Treg.trait17	CD3 on CD45RA+ CD4+	GCST90001858	ebi-a-GCST90001858
MFI	Treg	Blue.530.30.Treg.trait2	CD3 on CD8br	GCST90001859	ebi-a-GCST90001859
MFI	Treg	Blue.530.30.Treg.trait21	CD3 on CD39+ CD4+	GCST90001860	ebi-a-GCST90001860
MFI	Treg	Blue.530.30.Treg.trait22	CD3 on CD28+ CD4+	GCST90001861	ebi-a-GCST90001861
MFI	Treg	Blue.530.30.Treg.trait23	CD3 on CD28+ DN (CD4-CD8-)	GCST90001862	ebi-a-GCST90001862
MFI	Treg	Blue.530.30.Treg.trait3	CD3 on CD28+ CD45RA- CD8br	GCST90001863	ebi-a-GCST90001863
MFI	Treg	Blue.530.30.Treg.trait4	CD3 on CD28+ CD45RA+ CD8br	GCST90001864	ebi-a-GCST90001864
MFI	Treg	Blue.530.30.Treg.trait5	CD3 on CD28- CD8br	GCST90001865	ebi-a-GCST90001865
MFI	Treg	Blue.530.30.Treg.trait6	CD3 on CD39+ CD8br	GCST90001866	ebi-a-GCST90001866
MFI	Treg	Blue.530.30.Treg.trait7	CD3 on CD4+	GCST90001867	ebi-a-GCST90001867
MFI	Treg	Blue.530.30.Treg.trait8	CD3 on CD4 Treg	GCST90001868	ebi-a-GCST90001868
MFI	Treg	Blue.530.30.Treg.trait9	CD3 on resting Treg	GCST90001869	ebi-a-GCST90001869
MFI	Myeloid cell	Blue.585.42.MDSC.trait1	CD34 on HSC	GCST90001870	ebi-a-GCST90001870
MFI	Maturation stages of T cell	HVEM1000_150630.trait1	HVEM on T cell	GCST90001871	ebi-a-GCST90001871
MFI	Maturation stages of T cell	HVEM1000_150630.trait10	HVEM on naive CD8br	GCST90001872	ebi-a-GCST90001872
MFI	Maturation stages of T cell	HVEM1000_150630.trait11	HVEM on EM CD8br	GCST90001873	ebi-a-GCST90001873
MFI	Maturation stages of T cell	HVEM1000_150630.trait12	HVEM on TD CD8br	GCST90001874	ebi-a-GCST90001874
MFI	Maturation stages of T cell	HVEM1000_150630.trait2	HVEM on CD4+	GCST90001875	ebi-a-GCST90001875
MFI	Maturation stages of T cell	HVEM1000_150630.trait3	HVEM on CM CD4+	GCST90001876	ebi-a-GCST90001876
MFI	Maturation stages of T cell	HVEM1000_150630.trait4	HVEM on naive CD4+	GCST90001877	ebi-a-GCST90001877
MFI	Maturation stages of T cell	HVEM1000_150630.trait5	HVEM on EM CD4+	GCST90001878	ebi-a-GCST90001878
MFI	Maturation stages of T cell	HVEM1000_150630.trait6	HVEM on TD CD4+	GCST90001879	ebi-a-GCST90001879
MFI	Maturation stages of T cell	HVEM1000_150630.trait7	HVEM on CD45RA- CD4+	GCST90001880	ebi-a-GCST90001880
MFI	Maturation stages of T cell	HVEM1000_150630.trait8	HVEM on CD8br	GCST90001881	ebi-a-GCST90001881
MFI	Maturation stages of T cell	HVEM1000_150630.trait9	HVEM on CM CD8br	GCST90001882	ebi-a-GCST90001882
MFI	TBNK	Blue.585.42.TBNK.trait1	CD16-CD56 on NKT	GCST90001883	ebi-a-GCST90001883
MFI	TBNK	Blue.585.42.TBNK.trait2	CD16-CD56 on NK	GCST90001884	ebi-a-GCST90001884
MFI	TBNK	Blue.585.42.TBNK.trait3	CD16-CD56 on HLA DR+ NK	GCST90001885	ebi-a-GCST90001885
MFI	Treg	Blue.585.42.Treg.trait10	CD28 on CD39+ activated Treg	GCST90001886	ebi-a-GCST90001886
MFI	Treg	Blue.585.42.Treg.trait11	CD28 on secreting Treg	GCST90001887	ebi-a-GCST90001887
MFI	Treg	Blue.585.42.Treg.trait12	CD28 on CD39+ secreting Treg	GCST90001888	ebi-a-GCST90001888
MFI	Treg	Blue.585.42.Treg.trait13	CD28 on activated & secreting Treg	GCST90001889	ebi-a-GCST90001889
MFI	Treg	Blue.585.42.Treg.trait15	CD28 on CD45RA+ CD4+	GCST90001890	ebi-a-GCST90001890
MFI	Treg	Blue.585.42.Treg.trait18	CD28 on CD45RA- CD4 not Treg	GCST90001891	ebi-a-GCST90001891
MFI	Treg	Blue.585.42.Treg.trait19	CD28 on CD39+ CD4+	GCST90001892	ebi-a-GCST90001892
MFI	Treg	Blue.585.42.Treg.trait2	CD28 on CD28+ CD45RA- CD8br	GCST90001893	ebi-a-GCST90001893
MFI	Treg	Blue.585.42.Treg.trait20	CD28 on CD28+ CD4+	GCST90001894	ebi-a-GCST90001894
MFI	Treg	Blue.585.42.Treg.trait21	CD28 on CD28+ DN (CD4-CD8-)	GCST90001895	ebi-a-GCST90001895
MFI	Treg	Blue.585.42.Treg.trait3	CD28 on CD28+ CD45RA+ CD8br	GCST90001896	ebi-a-GCST90001896
MFI	Treg	Blue.585.42.Treg.trait4	CD28 on CD39+ CD8br	GCST90001897	ebi-a-GCST90001897
MFI	Treg	Blue.585.42.Treg.trait5	CD28 on CD4+	GCST90001898	ebi-a-GCST90001898
MFI	Treg	Blue.585.42.Treg.trait6	CD28 on CD4 Treg	GCST90001899	ebi-a-GCST90001899
MFI	Treg	Blue.585.42.Treg.trait7	CD28 on resting Treg	GCST90001900	ebi-a-GCST90001900
MFI	Treg	Blue.585.42.Treg.trait8	CD28 on CD39+ resting Treg	GCST90001901	ebi-a-GCST90001901
MFI	Treg	Blue.585.42.Treg.trait9	CD28 on activated Treg	GCST90001902	ebi-a-GCST90001902
MFI	cDC	Blue.670.LP.cDC.trait1	CD86 on myeloid DC	GCST90001903	ebi-a-GCST90001903
MFI	cDC	Blue.670.LP.cDC.trait2	CD86 on CD62L+ myeloid DC	GCST90001904	ebi-a-GCST90001904
MFI	cDC	Blue.670.LP.cDC.trait3	CD86 on monocyte	GCST90001905	ebi-a-GCST90001905
MFI	cDC	Blue.670.LP.cDC.trait4	CD86 on granulocyte	GCST90001906	ebi-a-GCST90001906
MFI	Maturation stages of T cell	Blue.670.LP.MT.trait1	CCR7 on naive CD4+	GCST90001907	ebi-a-GCST90001907
MFI	Maturation stages of T cell	Blue.670.LP.MT.trait3	CCR7 on naive CD8br	GCST90001908	ebi-a-GCST90001908
MFI	TBNK	Blue.670.LP.TBNK.trait1	CD45 on CD14+ monocyte	GCST90001909	ebi-a-GCST90001909
MFI	TBNK	Blue.670.LP.TBNK.trait10	CD45 on B cell	GCST90001910	ebi-a-GCST90001910
MFI	TBNK	Blue.670.LP.TBNK.trait11	CD45 on NK	GCST90001911	ebi-a-GCST90001911
MFI	TBNK	Blue.670.LP.TBNK.trait12	CD45 on HLA DR+ NK	GCST90001912	ebi-a-GCST90001912
MFI	TBNK	Blue.670.LP.TBNK.trait13	CD45 on granulocyte	GCST90001913	ebi-a-GCST90001913
MFI	TBNK	Blue.670.LP.TBNK.trait2	CD45 on lymphocyte	GCST90001914	ebi-a-GCST90001914
MFI	TBNK	Blue.670.LP.TBNK.trait3	CD45 on T cell	GCST90001915	ebi-a-GCST90001915
MFI	TBNK	Blue.670.LP.TBNK.trait4	CD45 on CD4+	GCST90001916	ebi-a-GCST90001916
MFI	TBNK	Blue.670.LP.TBNK.trait5	CD45 on CD8br	GCST90001917	ebi-a-GCST90001917
MFI	TBNK	Blue.670.LP.TBNK.trait6	CD45 on HLA DR+ T cell	GCST90001918	ebi-a-GCST90001918
MFI	TBNK	Blue.670.LP.TBNK.trait7	CD45 on NKT	GCST90001919	ebi-a-GCST90001919
MFI	TBNK	Blue.670.LP.TBNK.trait8	CD45 on HLA DR+ CD4+	GCST90001920	ebi-a-GCST90001920
MFI	TBNK	Blue.670.LP.TBNK.trait9	CD45 on HLA DR+ CD8br	GCST90001921	ebi-a-GCST90001921
MFI	Treg	Blue.670.LP.Treg.trait1	CD127 on T cell	GCST90001922	ebi-a-GCST90001922
MFI	Treg	Blue.670.LP.Treg.trait10	CD127 on CD45RA- CD4 not Treg	GCST90001923	ebi-a-GCST90001923
MFI	Treg	Blue.670.LP.Treg.trait11	CD127 on CD28+ CD4+	GCST90001924	ebi-a-GCST90001924
MFI	Treg	Blue.670.LP.Treg.trait12	CD127 on CD28+ DN (CD4-CD8-)	GCST90001925	ebi-a-GCST90001925
MFI	Treg	Blue.670.LP.Treg.trait13	CD127 on granulocyte	GCST90001926	ebi-a-GCST90001926
MFI	Treg	Blue.670.LP.Treg.trait2	CD127 on CD8br	GCST90001927	ebi-a-GCST90001927
MFI	Treg	Blue.670.LP.Treg.trait3	CD127 on CD28+ CD45RA- CD8br	GCST90001928	ebi-a-GCST90001928
MFI	Treg	Blue.670.LP.Treg.trait4	CD127 on CD28+ CD45RA+ CD8br	GCST90001929	ebi-a-GCST90001929
MFI	Treg	Blue.670.LP.Treg.trait5	CD127 on CD28- CD8br	GCST90001930	ebi-a-GCST90001930
MFI	Treg	Blue.670.LP.Treg.trait6	CD127 on CD4+	GCST90001931	ebi-a-GCST90001931
MFI	Treg	Blue.670.LP.Treg.trait7	CD127 on CD45RA+ CD4+	GCST90001932	ebi-a-GCST90001932
MFI	Treg	Blue.780.60.CD25.trait1	CD25 on CD45RA- CD4 not Treg	GCST90001933	ebi-a-GCST90001933
MFI	Treg	Blue.780.60.CD25.trait13	CD25 on CD45RA+ CD4 not Treg	GCST90001934	ebi-a-GCST90001934
MFI	Treg	Blue.780.60.CD25.trait10	CD25 on CD39+ CD4 Treg	GCST90001935	ebi-a-GCST90001935
MFI	Treg	Blue.780.60.CD25.trait2	CD25 on CD4 Treg	GCST90001936	ebi-a-GCST90001936
MFI	Treg	Blue.780.60.CD25.trait3	CD25 on resting Treg	GCST90001937	ebi-a-GCST90001937
MFI	Treg	Blue.780.60.CD25.trait4	CD25 on CD39+ resting Treg	GCST90001938	ebi-a-GCST90001938
MFI	Treg	Blue.780.60.CD25.trait5	CD25 on activated Treg	GCST90001939	ebi-a-GCST90001939
MFI	Treg	Blue.780.60.CD25.trait6	CD25 on CD39+ activated Treg	GCST90001940	ebi-a-GCST90001940
MFI	Treg	Blue.780.60.CD25.trait7	CD25 on secreting Treg	GCST90001941	ebi-a-GCST90001941
MFI	Treg	Blue.780.60.CD25.trait8	CD25 on CD39+ secreting Treg	GCST90001942	ebi-a-GCST90001942
MFI	Treg	Blue.780.60.CD25.trait9	CD25 on activated & secreting Treg	GCST90001943	ebi-a-GCST90001943
MFI	cDC	Blue.780.60.cDC.trait1	CD123 on plasmacytoid DC	GCST90001944	ebi-a-GCST90001944
MFI	cDC	Blue.780.60.cDC.trait2	CD123 on CD62L+ plasmacytoid DC	GCST90001945	ebi-a-GCST90001945
MFI	Myeloid cell	Blue.780.60.MDSC.trait1	CD33 on CD14+ monocyte	GCST90001946	ebi-a-GCST90001946
MFI	Myeloid cell	Blue.780.60.MDSC.trait10	CD33 on CD33br HLA DR+ CD14dim	GCST90001947	ebi-a-GCST90001947
MFI	Myeloid cell	Blue.780.60.MDSC.trait12	CD33 on CD33dim HLA DR+ CD11b+	GCST90001948	ebi-a-GCST90001948
MFI	Myeloid cell	Blue.780.60.MDSC.trait13	CD33 on CD33dim HLA DR+ CD11b-	GCST90001949	ebi-a-GCST90001949
MFI	Myeloid cell	Blue.780.60.MDSC.trait14	CD33 on Gr MDSC	GCST90001950	ebi-a-GCST90001950
MFI	Myeloid cell	Blue.780.60.MDSC.trait2	CD33 on CD66b++ myeloid cell	GCST90001951	ebi-a-GCST90001951
MFI	Myeloid cell	Blue.780.60.MDSC.trait3	CD33 on Mo MDSC	GCST90001952	ebi-a-GCST90001952
MFI	Myeloid cell	Blue.780.60.MDSC.trait4	CD33 on CD33dim HLA DR-	GCST90001953	ebi-a-GCST90001953
MFI	Myeloid cell	Blue.780.60.MDSC.trait6	CD33 on basophil	GCST90001954	ebi-a-GCST90001954
MFI	Myeloid cell	Blue.780.60.MDSC.trait7	CD33 on Im MDSC	GCST90001955	ebi-a-GCST90001955
MFI	Myeloid cell	Blue.780.60.MDSC.trait8	CD33 on CD33br HLA DR+	GCST90001956	ebi-a-GCST90001956
MFI	Myeloid cell	Blue.780.60.MDSC.trait9	CD33 on CD33br HLA DR+ CD14-	GCST90001957	ebi-a-GCST90001957
MFI	TBNK	Blue.780.60.TBNK.trait1	CD4 on monocyte	GCST90001958	ebi-a-GCST90001958
MFI	TBNK	Blue.780.60.TBNK.trait3	CD4 on HLA DR+ CD4+	GCST90001959	ebi-a-GCST90001959
MFI	Treg	Blue.780.60.Treg.trait4	CD25 on CD4+	GCST90001960	ebi-a-GCST90001960
MFI	Treg	Blue.780.60.Treg.trait5	CD25 on CD39+ CD4+	GCST90001961	ebi-a-GCST90001961
MFI	Treg	Blue.780.60.Treg.trait6	CD25 on CD28+ CD4+	GCST90001962	ebi-a-GCST90001962
Morphological parameter	cDC	FSC.cDC.trait2	FSC-A on myeloid DC	GCST90001963	ebi-a-GCST90001963
Morphological parameter	cDC	FSC.cDC.trait3	FSC-A on plasmacytoid DC	GCST90001964	ebi-a-GCST90001964
Morphological parameter	cDC	FSC.cDC.trait4	FSC-A on monocyte	GCST90001965	ebi-a-GCST90001965
Morphological parameter	cDC	FSC.cDC.trait5	FSC-A on granulocyte	GCST90001966	ebi-a-GCST90001966
Morphological parameter	TBNK	FSC.TBNK.trait1	FSC-A on CD14+ monocyte	GCST90001967	ebi-a-GCST90001967
Morphological parameter	TBNK	FSC.TBNK.trait10	FSC-A on B cell	GCST90001968	ebi-a-GCST90001968
Morphological parameter	TBNK	FSC.TBNK.trait11	FSC-A on NK	GCST90001969	ebi-a-GCST90001969
Morphological parameter	TBNK	FSC.TBNK.trait12	FSC-A on HLA DR+ NK	GCST90001970	ebi-a-GCST90001970
Morphological parameter	TBNK	FSC.TBNK.trait2	FSC-A on lymphocyte	GCST90001971	ebi-a-GCST90001971
Morphological parameter	TBNK	FSC.TBNK.trait3	FSC-A on T cell	GCST90001972	ebi-a-GCST90001972
Morphological parameter	TBNK	FSC.TBNK.trait4	FSC-A on CD4+	GCST90001973	ebi-a-GCST90001973
Morphological parameter	TBNK	FSC.TBNK.trait5	FSC-A on CD8br	GCST90001974	ebi-a-GCST90001974
Morphological parameter	TBNK	FSC.TBNK.trait6	FSC-A on HLA DR+ T cell	GCST90001975	ebi-a-GCST90001975
Morphological parameter	TBNK	FSC.TBNK.trait7	FSC-A on NKT	GCST90001976	ebi-a-GCST90001976
Morphological parameter	TBNK	FSC.TBNK.trait8	FSC-A on HLA DR+ CD4+	GCST90001977	ebi-a-GCST90001977
Morphological parameter	TBNK	FSC.TBNK.trait9	FSC-A on HLA DR+ CD8br	GCST90001978	ebi-a-GCST90001978
MFI	Monocyte	mono.trait1	CD16 on CD14- CD16+ monocyte	GCST90001979	ebi-a-GCST90001979
MFI	Monocyte	mono.trait10	CD40 on CD14+ CD16- monocyte	GCST90001980	ebi-a-GCST90001980
MFI	Monocyte	mono.trait11	CD40 on CD14+ CD16+ monocyte	GCST90001981	ebi-a-GCST90001981
MFI	Monocyte	mono.trait12	CCR2 on CD14- CD16+ monocyte	GCST90001982	ebi-a-GCST90001982
MFI	Monocyte	mono.trait14	CD14 on CD14+ CD16+ monocyte	GCST90001983	ebi-a-GCST90001983
MFI	Monocyte	mono.trait16	HLA DR on CD14- CD16+ monocyte	GCST90001984	ebi-a-GCST90001984
MFI	Monocyte	mono.trait17	CD40 on monocytes	GCST90001985	ebi-a-GCST90001985
MFI	Monocyte	mono.trait19	CD14 on CD14+ CD16- monocyte	GCST90001986	ebi-a-GCST90001986
MFI	Monocyte	mono.trait2	CD64 on CD14+ CD16- monocyte	GCST90001987	ebi-a-GCST90001987
MFI	Monocyte	mono.trait21	HLA DR on CD14+ CD16- monocyte	GCST90001988	ebi-a-GCST90001988
MFI	Monocyte	mono.trait22	CD40 on CD14- CD16+ monocyte	GCST90001989	ebi-a-GCST90001989
MFI	Monocyte	mono.trait24	CD64 on CD14- CD16+ monocyte	GCST90001990	ebi-a-GCST90001990
MFI	Monocyte	mono.trait25	HLA DR on CD14+ monocyte	GCST90001991	ebi-a-GCST90001991
MFI	Monocyte	mono.trait28	CCR2 on CD14+ CD16+ monocyte	GCST90001992	ebi-a-GCST90001992
MFI	Monocyte	mono.trait29	PDL-1 on CD14+ CD16- monocyte	GCST90001993	ebi-a-GCST90001993
MFI	Monocyte	mono.trait3	CX3CR1 on CD14- CD16-	GCST90001994	ebi-a-GCST90001994
MFI	Monocyte	mono.trait33	CX3CR1 on monocyte	GCST90001995	ebi-a-GCST90001995
MFI	Monocyte	mono.trait35	CX3CR1 on CD14+ CD16+ monocyte	GCST90001996	ebi-a-GCST90001996
MFI	Monocyte	mono.trait36	CX3CR1 on CD14+ CD16- monocyte	GCST90001997	ebi-a-GCST90001997
MFI	Monocyte	mono.trait39	PDL-1 on CD14+ CD16+ monocyte	GCST90001998	ebi-a-GCST90001998
MFI	Monocyte	mono.trait4	PDL-1 on CD14- CD16+ monocyte	GCST90001999	ebi-a-GCST90001999
MFI	Monocyte	mono.trait41	PDL-1 on CD14- CD16-	GCST90002000	ebi-a-GCST90002000
MFI	Monocyte	mono.trait42	CD64 on CD14- CD16-	GCST90002001	ebi-a-GCST90002001
MFI	Monocyte	mono.trait43	PDL-1 on monocyte	GCST90002002	ebi-a-GCST90002002
MFI	Monocyte	mono.trait44	CCR2 on CD14- CD16-	GCST90002003	ebi-a-GCST90002003
MFI	Monocyte	mono.trait46	CCR2 on CD14+ CD16- monocyte	GCST90002004	ebi-a-GCST90002004
MFI	Monocyte	mono.trait47	CD16 on CD14+ CD16+ monocyte	GCST90002005	ebi-a-GCST90002005
MFI	Monocyte	mono.trait48	CD64 on monocyte	GCST90002006	ebi-a-GCST90002006
MFI	Monocyte	mono.trait50	HLA DR on CD14+ CD16+ monocyte	GCST90002007	ebi-a-GCST90002007
MFI	Monocyte	mono.trait52	CCR2 on monocyte	GCST90002008	ebi-a-GCST90002008
MFI	Monocyte	mono.trait53	HLA DR on CD14- CD16-	GCST90002009	ebi-a-GCST90002009
MFI	Monocyte	mono.trait54	HLA DR on monocyte	GCST90002010	ebi-a-GCST90002010
MFI	Monocyte	mono.trait6	CD64 on CD14+ CD16+ monocyte	GCST90002011	ebi-a-GCST90002011
MFI	Monocyte	mono.trait7	CX3CR1 on CD14- CD16+ monocyte	GCST90002012	ebi-a-GCST90002012
MFI	cDC	Red.660.20.cDC.trait1	CCR2 on myeloid DC	GCST90002013	ebi-a-GCST90002013
MFI	cDC	Red.660.20.cDC.trait2	CCR2 on CD62L+ myeloid DC	GCST90002014	ebi-a-GCST90002014
MFI	cDC	Red.660.20.cDC.trait3	CCR2 on plasmacytoid DC	GCST90002015	ebi-a-GCST90002015
MFI	cDC	Red.660.20.cDC.trait4	CCR2 on CD62L+ plasmacytoid DC	GCST90002016	ebi-a-GCST90002016
MFI	cDC	Red.660.20.cDC.trait5	CCR2 on monocyte	GCST90002017	ebi-a-GCST90002017
MFI	cDC	Red.660.20.cDC.trait6	CCR2 on granulocyte	GCST90002018	ebi-a-GCST90002018
MFI	Myeloid cell	Red.660.20.MDSC.trait2	CD14 on Mo MDSC	GCST90002019	ebi-a-GCST90002019
MFI	Myeloid cell	Red.660.20.MDSC.trait3	CD14 on CD33br HLA DR+ CD14dim	GCST90002020	ebi-a-GCST90002020
MFI	Myeloid cell	Red.660.20.MDSC.trait4	CD14 on CD33dim HLA DR+ CD11b+	GCST90002021	ebi-a-GCST90002021
MFI	Maturation stages of T cell	Red.660.20.MT.trait1	CD4 on CD4+	GCST90002022	ebi-a-GCST90002022
MFI	Maturation stages of T cell	Red.660.20.MT.trait2	CD4 on CM CD4 +	GCST90002023	ebi-a-GCST90002023
MFI	Maturation stages of T cell	Red.660.20.MT.trait3	CD4 on naive CD4+	GCST90002024	ebi-a-GCST90002024
MFI	Maturation stages of T cell	Red.660.20.MT.trait4	CD4 on EM CD4+	GCST90002025	ebi-a-GCST90002025
MFI	Maturation stages of T cell	Red.660.20.MT.trait5	CD4 on TD CD4+	GCST90002026	ebi-a-GCST90002026
MFI	Maturation stages of T cell	Red.660.20.MT.trait6	CD4 on CD45RA+ CD4+	GCST90002027	ebi-a-GCST90002027
MFI	TBNK	Red.660.20.TBNK.trait2	CD19 on B cell	GCST90002028	ebi-a-GCST90002028
MFI	Treg	Red.660.20.Treg.trait1	CD39 on CD39+ CD8br	GCST90002029	ebi-a-GCST90002029
MFI	Treg	Red.660.20.Treg.trait2	CD39 on CD39+ activated Treg	GCST90002030	ebi-a-GCST90002030
MFI	Treg	Red.660.20.Treg.trait3	CD39 on CD39+ secreting Treg	GCST90002031	ebi-a-GCST90002031
MFI	Treg	Red.660.20.Treg.trait5	CD39 on CD39+ CD4+	GCST90002032	ebi-a-GCST90002032
MFI	Treg	Red.660.20.Treg.trait6	CD39 on granulocyte	GCST90002033	ebi-a-GCST90002033
MFI	Treg	Red.660.20.Treg.trait7	CD39 on monocyte	GCST90002034	ebi-a-GCST90002034
MFI	cDC	Red.780.60.cDC.trait1	CD80 on myeloid DC	GCST90002035	ebi-a-GCST90002035
MFI	cDC	Red.780.60.cDC.trait2	CD80 on CD62L+ myeloid DC	GCST90002036	ebi-a-GCST90002036
MFI	cDC	Red.780.60.cDC.trait3	CD80 on plasmacytoid DC	GCST90002037	ebi-a-GCST90002037
MFI	cDC	Red.780.60.cDC.trait4	CD80 on CD62L+ plasmacytoid DC	GCST90002038	ebi-a-GCST90002038
MFI	cDC	Red.780.60.cDC.trait5	CD80 on monocyte	GCST90002039	ebi-a-GCST90002039
MFI	cDC	Red.780.60.cDC.trait6	CD80 on granulocyte	GCST90002040	ebi-a-GCST90002040
MFI	Myeloid cell	Red.780.60.MDSC.trait1	CD45 on lymphocyte	GCST90002041	ebi-a-GCST90002041
MFI	Myeloid cell	Red.780.60.MDSC.trait10	CD45 on CD33br HLA DR+ CD14-	GCST90002042	ebi-a-GCST90002042
MFI	Myeloid cell	Red.780.60.MDSC.trait11	CD45 on CD33br HLA DR+ CD14dim	GCST90002043	ebi-a-GCST90002043
MFI	Myeloid cell	Red.780.60.MDSC.trait13	CD45 on CD33dim HLA DR+ CD11b-	GCST90002044	ebi-a-GCST90002044
MFI	Myeloid cell	Red.780.60.MDSC.trait14	CD45 on CD33- HLA DR-	GCST90002045	ebi-a-GCST90002045
MFI	Myeloid cell	Red.780.60.MDSC.trait15	CD45 on CD33- HLA DR+	GCST90002046	ebi-a-GCST90002046
MFI	Myeloid cell	Red.780.60.MDSC.trait16	CD45 on Gr MDSC	GCST90002047	ebi-a-GCST90002047
MFI	Myeloid cell	Red.780.60.MDSC.trait3	CD45 on CD66b++ myelod cell	GCST90002048	ebi-a-GCST90002048
MFI	Myeloid cell	Red.780.60.MDSC.trait4	CD45 on Mo MDSC	GCST90002049	ebi-a-GCST90002049
MFI	Myeloid cell	Red.780.60.MDSC.trait5	CD45 on CD33dim HLA DR-	GCST90002050	ebi-a-GCST90002050
MFI	Myeloid cell	Red.780.60.MDSC.trait7	CD45 on basophil	GCST90002051	ebi-a-GCST90002051
MFI	Myeloid cell	Red.780.60.MDSC.trait8	CD45 on Im MDSC	GCST90002052	ebi-a-GCST90002052
MFI	Myeloid cell	Red.780.60.MDSC.trait9	CD45 on CD33br HLA DR+	GCST90002053	ebi-a-GCST90002053
MFI	Maturation stages of T cell	Red.780.60.MT.trait2	CD8 on CM CD8br	GCST90002054	ebi-a-GCST90002054
MFI	Maturation stages of T cell	Red.780.60.MT.trait3	CD8 on naive CD8br	GCST90002055	ebi-a-GCST90002055
MFI	Maturation stages of T cell	Red.780.60.MT.trait4	CD8 on EM CD8br	GCST90002056	ebi-a-GCST90002056
MFI	Maturation stages of T cell	Red.780.60.MT.trait5	CD8 on TD CD8br	GCST90002057	ebi-a-GCST90002057
MFI	TBNK	Red.780.60.TBNK.trait1	CD8 on CD8br	GCST90002058	ebi-a-GCST90002058
MFI	TBNK	Red.780.60.TBNK.trait2	CD8 on NKT	GCST90002059	ebi-a-GCST90002059
MFI	TBNK	Red.780.60.TBNK.trait3	CD8 on HLA DR+ CD8br	GCST90002060	ebi-a-GCST90002060
MFI	Treg	Red.780.60.Treg.trait15	CD4 on CD39+ CD4+	GCST90002061	ebi-a-GCST90002061
MFI	Treg	Red.780.60.Treg.trait16	CD4 on CD28+ CD4+	GCST90002062	ebi-a-GCST90002062
MFI	Treg	Red.780.60.Treg.trait2	CD4 on CD4 Treg	GCST90002063	ebi-a-GCST90002063
MFI	Treg	Red.780.60.Treg.trait3	CD4 on resting Treg	GCST90002064	ebi-a-GCST90002064
MFI	Treg	Red.780.60.Treg.trait4	CD4 on CD39+ resting Treg	GCST90002065	ebi-a-GCST90002065
MFI	Treg	Red.780.60.Treg.trait5	CD4 on activated Treg	GCST90002066	ebi-a-GCST90002066
MFI	Treg	Red.780.60.Treg.trait6	CD4 on CD39+ activated Treg	GCST90002067	ebi-a-GCST90002067
MFI	Treg	Red.780.60.Treg.trait7	CD4 on secreting Treg	GCST90002068	ebi-a-GCST90002068
MFI	Treg	Red.780.60.Treg.trait8	CD4 on CD39+ secreting Treg	GCST90002069	ebi-a-GCST90002069
MFI	Treg	Red.780.60.Treg.trait9	CD4 on activated & secreting Treg	GCST90002070	ebi-a-GCST90002070
Morphological parameter	cDC	SSC.cDC.trait2	SSC-A on myeloid DC	GCST90002071	ebi-a-GCST90002071
Morphological parameter	cDC	SSC.cDC.trait3	SSC-A on plasmacytoid DC	GCST90002072	ebi-a-GCST90002072
Morphological parameter	cDC	SSC.cDC.trait4	SSC-A on monocyte	GCST90002073	ebi-a-GCST90002073
Morphological parameter	TBNK	SSC.TBNK.trait1	SSC-A on CD14+ monocyte	GCST90002074	ebi-a-GCST90002074
Morphological parameter	TBNK	SSC.TBNK.trait10	SSC-A on B cell	GCST90002075	ebi-a-GCST90002075
Morphological parameter	TBNK	SSC.TBNK.trait11	SSC-A on NK	GCST90002076	ebi-a-GCST90002076
Morphological parameter	TBNK	SSC.TBNK.trait12	SSC-A on HLA DR+ NK	GCST90002077	ebi-a-GCST90002077
Morphological parameter	TBNK	SSC.TBNK.trait13	SSC-A on granulocyte	GCST90002078	ebi-a-GCST90002078
Morphological parameter	TBNK	SSC.TBNK.trait2	SSC-A on lymphocyte	GCST90002079	ebi-a-GCST90002079
Morphological parameter	TBNK	SSC.TBNK.trait3	SSC-A on T cell	GCST90002080	ebi-a-GCST90002080
Morphological parameter	TBNK	SSC.TBNK.trait4	SSC-A on CD4+	GCST90002081	ebi-a-GCST90002081
Morphological parameter	TBNK	SSC.TBNK.trait5	SSC-A on CD8br	GCST90002082	ebi-a-GCST90002082
Morphological parameter	TBNK	SSC.TBNK.trait6	SSC-A on HLA DR+ T cell	GCST90002083	ebi-a-GCST90002083
Morphological parameter	TBNK	SSC.TBNK.trait7	SSC-A on NKT	GCST90002084	ebi-a-GCST90002084
Morphological parameter	TBNK	SSC.TBNK.trait8	SSC-A on HLA DR+ CD4+	GCST90002085	ebi-a-GCST90002085
Morphological parameter	TBNK	SSC.TBNK.trait9	SSC-A on HLA DR+ CD8br	GCST90002086	ebi-a-GCST90002086
MFI	cDC	Violet.450.50.cDC.trait1	CD11c on myeloid DC	GCST90002087	ebi-a-GCST90002087
MFI	cDC	Violet.450.50.cDC.trait2	CD11c on CD62L+ myeloid DC	GCST90002088	ebi-a-GCST90002088
MFI	cDC	Violet.450.50.cDC.trait3	CD11c on monocyte	GCST90002089	ebi-a-GCST90002089
MFI	cDC	Violet.450.50.cDC.trait4	CD11c on granulocyte	GCST90002090	ebi-a-GCST90002090
MFI	Myeloid cell	Violet.450.50.MDSC.trait1	CD11b on CD14+ monocyte	GCST90002091	ebi-a-GCST90002091
MFI	Myeloid cell	Violet.450.50.MDSC.trait13	CD11b on Gr MDSC	GCST90002092	ebi-a-GCST90002092
MFI	Myeloid cell	Violet.450.50.MDSC.trait2	CD11b on CD66b++ myeloid cell	GCST90002093	ebi-a-GCST90002093
MFI	Myeloid cell	Violet.450.50.MDSC.trait3	CD11b on Mo MDSC	GCST90002094	ebi-a-GCST90002094
MFI	Myeloid cell	Violet.450.50.MDSC.trait4	CD11b on CD33dim HLA DR-	GCST90002095	ebi-a-GCST90002095
MFI	Myeloid cell	Violet.450.50.MDSC.trait6	CD11b on basophil	GCST90002096	ebi-a-GCST90002096
MFI	Myeloid cell	Violet.450.50.MDSC.trait9	CD11b on CD33br HLA DR+ CD14dim	GCST90002097	ebi-a-GCST90002097
MFI	Maturation stages of T cell	Violet.450.50.MT.trait1	CD45RA on naive CD4+	GCST90002098	ebi-a-GCST90002098
MFI	Maturation stages of T cell	Violet.450.50.MT.trait2	CD4RA on TD CD4+	GCST90002099	ebi-a-GCST90002099
MFI	Maturation stages of T cell	Violet.450.50.MT.trait3	CD45RA on naive CD8br	GCST90002100	ebi-a-GCST90002100
MFI	Maturation stages of T cell	Violet.450.50.MT.trait4	CD45RA on TD CD8br	GCST90002101	ebi-a-GCST90002101
MFI	Treg	Violet.450.50.Treg.trait2	CD45RA on resting Treg	GCST90002102	ebi-a-GCST90002102
MFI	Treg	Violet.450.50.Treg.trait3	CD45RA on CD39+ resting Treg	GCST90002103	ebi-a-GCST90002103
MFI	cDC	Violet.510.50.cDC.trait2	HLA DR on myeloid DC	GCST90002104	ebi-a-GCST90002104
MFI	cDC	Violet.510.50.cDC.trait3	HLA DR on plasmacytoid DC	GCST90002105	ebi-a-GCST90002105
MFI	cDC	Violet.510.50.cDC.trait4	HLA DR on DC	GCST90002106	ebi-a-GCST90002106
MFI	Myeloid cell	Violet.510.50.MDSC.trait1	HLA DR on HSC	GCST90002107	ebi-a-GCST90002107
MFI	Myeloid cell	Violet.510.50.MDSC.trait3	HLA DR on CD33br HLA DR+ CD14-	GCST90002108	ebi-a-GCST90002108
MFI	Myeloid cell	Violet.510.50.MDSC.trait4	HLA DR on CD33br HLA DR+ CD14dim	GCST90002109	ebi-a-GCST90002109
MFI	Myeloid cell	Violet.510.50.MDSC.trait5	HLA DR on CD33dim HLA DR+ CD11b+	GCST90002110	ebi-a-GCST90002110
MFI	Myeloid cell	Violet.510.50.MDSC.trait6	HLA DR on CD33dim HLA DR+ CD11b-	GCST90002111	ebi-a-GCST90002111
MFI	Myeloid cell	Violet.510.50.MDSC.trait7	HLA DR on CD33- HLA DR+	GCST90002112	ebi-a-GCST90002112
MFI	TBNK	Violet.510.50.TBNK.trait2	HLA DR on HLA DR+ T cell	GCST90002113	ebi-a-GCST90002113
MFI	TBNK	Violet.510.50.TBNK.trait3	HLA DR on HLA DR+ CD4+	GCST90002114	ebi-a-GCST90002114
MFI	TBNK	Violet.510.50.TBNK.trait4	HLA DR on HLA DR+ CD8br	GCST90002115	ebi-a-GCST90002115
MFI	TBNK	Violet.510.50.TBNK.trait5	HLA DR on B cell	GCST90002116	ebi-a-GCST90002116
MFI	TBNK	Violet.510.50.TBNK.trait6	HLA DR on HLA DR+ NK	GCST90002117	ebi-a-GCST90002117
MFI	Treg	Violet.510.50.Treg.trait2	CD8 on CD28+ CD45RA- CD8br	GCST90002118	ebi-a-GCST90002118
MFI	Treg	Violet.510.50.Treg.trait3	CD8 on CD28+ CD45RA+ CD8br	GCST90002119	ebi-a-GCST90002119
MFI	Treg	Violet.510.50.Treg.trait4	CD8 on CD28- CD8br	GCST90002120	ebi-a-GCST90002120
MFI	Treg	Violet.510.50.Treg.trait5	CD8 on CD39+ CD8br	GCST90002121	ebi-a-GCST90002121
